# Supplementary material
Source: PubMed Central journal article supplement (PMC6461392)
Supplement: NIHMS1521224-supplement-Supplementary_Tables.pdf [file NIHMS1521224-supplement-Supplementary_Tables.pdf]

**Supplementary Table 1. Data collection and refinement statistics for MLCK1 IgCAM3 crystal structure\*.**

| MLCK1 IgCAM3                                             |                      |
|----------------------------------------------------------|----------------------|
| <b>Data collection</b>                                   |                      |
| Space group                                              | P6 <sub>5</sub>      |
| Cell dimensions                                          |                      |
| <i>a</i> , <i>b</i> , <i>c</i> (Å)                       | 74.69, 74.69, 131.48 |
| $\alpha$ , $\beta$ , $\gamma$ (°)                        | 90.0, 90.0, 120.0    |
| Resolution (Å)                                           | 46 – 2.5 *           |
| <i>R</i> <sub>sym</sub> or <i>R</i> <sub>merge</sub>     | 0.076 (0.879)        |
| <i>I</i> / $\sigma I$                                    | 13.2 (2.1)           |
| Completeness (%)                                         | 98.8 (99.9)          |
| Average redundancy                                       | 6.2                  |
| <b>Refinement</b>                                        |                      |
| Resolution (Å)                                           | 46 – 2.5             |
| No. reflections (working/test)                           | 14404 / 2842         |
| <i>R</i> <sub>cryst</sub> / <i>R</i> <sub>free</sub> (%) | 22.6 / 27.2          |
| No. atoms                                                |                      |
| Protein                                                  | 2247                 |
| Ligand/ion                                               | N/A                  |
| Water                                                    | 57                   |
| <i>B</i> -factors                                        |                      |
| Protein                                                  | 81                   |
| Ligand/ion                                               | N/A                  |
| Water                                                    | 60                   |
| R.m.s. deviations                                        |                      |
| Bond lengths (Å)                                         | 0.011                |
| Bond angles (°)                                          | 1.43                 |

\*Data were collected from a single crystal. \*Values in parentheses are for highest-resolution shell.

**Supplementary Table 2. Summary of biological screen results**

| <b>NSC number</b> | <b>Transepithelial resistance</b> | <b>Kinase activity</b> | <b>Gel contraction</b> |
|-------------------|-----------------------------------|------------------------|------------------------|
| 351093            | no effect                         |                        |                        |
| 42233             | no effect                         | inhibition             | Inhibition             |
| 31211             | increased                         | no effect              | Inhibition             |
| 14010             | no effect                         |                        |                        |
| 159456            | increased                         | inhibition             | no effect              |
| 353874            | no effect                         |                        |                        |
| 51344             | decreased                         | no effect              | no effect              |
| 91855             | no effect                         |                        |                        |
| <b>55937</b>      | <b>increased</b>                  | <b>no effect</b>       | <b>no effect</b>       |
| 134514            | no effect                         |                        |                        |
| 641058            | no effect                         |                        |                        |
| 294786            | no effect                         | inhibition             | inhibition             |
| 48770             | no effect                         | no effect              | inhibition             |
| 34629             | no effect                         |                        |                        |
| 68361             | no effect                         | inhibition             | no effect              |
| 267461            | no effect                         |                        |                        |
| 122301            | no effect                         |                        |                        |
